# Supplementary material
Source: MDPI journal article supplement (https://www.mdpi.com/2073-4344/11/2/238)
Supplement: s1 [file s1]

Archive with 2 entries (2 files):
- Birrell Catalysts 2021_SI.pdf
- Models.xlsx
