# Supplementary material
Source: MDPI journal article supplement (https://www.mdpi.com/2073-4344/11/2/238)
Supplement: s1 [file s1 › Models.xlsx]

## Sheet: Simple Nernst n=1
Molar gas constant	R (J/mol/K)	8.314		E (V) vs SHE	E (mV) vs SHE	α	Ox	Red	Total
Temperature	T (K)	298		-0.2	-200	0.000414402	0.999586	0.00041423	1
number of electrons	n	1		-0.21	-210	0.000611717	0.999389	0.000611343	1
Faraday constant	F (J/V)	96485		-0.22	-220	0.000902983	0.999098	0.000902169	1
Redox potential	E1 (V) vs SHE	-0.4		-0.23	-230	0.00133293	0.998669	0.00133116	1
				-0.24	-240	0.0019676	0.998036	0.00196374	1
E1				-0.25	-250	0.00290447	0.997104	0.00289606	1
Ox ⇌ Red				-0.26	-260	0.00428741	0.995731	0.00426911	1
				-0.27	-270	0.00632884	0.993711	0.00628904	1
				-0.28	-280	0.00934229	0.990744	0.00925582	1
				-0.29	-290	0.0137906	0.986397	0.013603	1
				-0.3	-300	0.0203569	0.980049	0.0199507	1
				-0.31	-310	0.0300497	0.970827	0.029173	1
				-0.32	-320	0.0443577	0.957526	0.0424736	1
				-0.33	-330	0.0654783	0.938546	0.0614544	1
				-0.34	-340	0.0966555	0.911863	0.0881366	1
				-0.35	-350	0.142678	0.875138	0.124862	1
				-0.36	-360	0.210613	0.826028	0.173972	1
				-0.37	-370	0.310895	0.762838	0.237162	1
				-0.38	-380	0.458926	0.685436	0.314564	1
				-0.39	-390	0.67744	0.596146	0.403854	1
				-0.4	-400	1	0.5	0.5	1
				-0.41	-410	1.47614	0.403854	0.596146	1
				-0.42	-420	2.179	0.314564	0.685436	1
				-0.43	-430	3.21652	0.237162	0.762838	1
				-0.44	-440	4.74805	0.173972	0.826028	1
				-0.45	-450	7.00881	0.124862	0.875138	1
				-0.46	-460	10.346	0.0881366	0.911863	1
				-0.47	-470	15.2722	0.0614544	0.938546	1
				-0.48	-480	22.544	0.0424736	0.957526	1
				-0.49	-490	33.2782	0.029173	0.970827	1
				-0.5	-500	49.1235	0.0199507	0.980049	1
				-0.51	-510	72.5133	0.013603	0.986397	1
				-0.52	-520	107.04	0.00925582	0.990744	1
				-0.53	-530	158.007	0.00628904	0.993711	1
				-0.54	-540	233.241	0.00426911	0.995731	1
				-0.55	-550	344.297	0.00289606	0.997104	1
				-0.56	-560	508.232	0.00196374	0.998036	1
				-0.57	-570	750.225	0.00133116	0.998669	1
				-0.58	-580	1107.44	0.000902169	0.999098	1
				-0.59	-590	1634.74	0.000611343	0.999389	1
				-0.6	-600	2413.12	0.00041423	0.999586	1

## Sheet: Simple pKa
pKa	7			[H+]	pH	Ox	OxH	Total
Ka	1e-07			0.0001	4	0.000999001	0.999001	1
				7.94328e-05	4.1	0.00125734	0.998743	1
Ka				6.30957e-05	4.2	0.00158239	0.998418	1
OxH ⇌ Ox + H+				5.01187e-05	4.3	0.00199129	0.998009	1
				3.98107e-05	4.4	0.00250559	0.997494	1
				3.16228e-05	4.5	0.00315231	0.996848	1
				2.51189e-05	4.6	0.00396529	0.996035	1
				1.99526e-05	4.7	0.00498688	0.995013	1
				1.58489e-05	4.8	0.00627001	0.99373	1
				1.25893e-05	4.9	0.00788068	0.992119	1
				1e-05	5	0.00990099	0.990099	1
				7.94328e-06	5.1	0.0124327	0.987567	1
				6.30957e-06	5.2	0.0156017	0.984398	1
				5.01187e-06	5.3	0.0195623	0.980438	1
				3.98107e-06	5.4	0.0245034	0.975497	1
				3.16228e-06	5.5	0.0306534	0.969347	1
				2.51189e-06	5.6	0.0382865	0.961713	1
				1.99526e-06	5.7	0.0477267	0.952273	1
				1.58489e-06	5.8	0.0593509	0.940649	1
				1.25893e-06	5.9	0.0735876	0.926412	1
				1e-06	6	0.0909091	0.909091	1
				7.94328e-07	6.1	0.111816	0.888184	1
				6.30957e-07	6.2	0.136807	0.863193	1
				5.01187e-07	6.3	0.166338	0.833662	1
				3.98107e-07	6.4	0.20076	0.79924	1
				3.16228e-07	6.5	0.240253	0.759747	1
				2.51189e-07	6.6	0.284747	0.715253	1
				1.99526e-07	6.7	0.333861	0.666139	1
				1.58489e-07	6.8	0.386863	0.613137	1
				1.25893e-07	6.9	0.442688	0.557312	1
				1e-07	7	0.5	0.5	1
				7.94328e-08	7.1	0.557312	0.442688	1
				6.30957e-08	7.2	0.613137	0.386863	1
				5.01187e-08	7.3	0.666139	0.333861	1
				3.98107e-08	7.4	0.715253	0.284747	1
				3.16228e-08	7.5	0.759747	0.240253	1
				2.51189e-08	7.6	0.79924	0.20076	1
				1.99526e-08	7.7	0.833662	0.166338	1
				1.58489e-08	7.8	0.863193	0.136807	1
				1.25893e-08	7.9	0.888184	0.111816	1
				1e-08	8	0.909091	0.0909091	1
				7.94328e-09	8.1	0.926412	0.0735876	1
				6.30957e-09	8.2	0.940649	0.0593509	1
				5.01187e-09	8.3	0.952273	0.0477267	1
				3.98107e-09	8.4	0.961713	0.0382865	1
				3.16228e-09	8.5	0.969347	0.0306534	1
				2.51189e-09	8.6	0.975497	0.0245034	1
				1.99526e-09	8.7	0.980438	0.0195623	1
				1.58489e-09	8.8	0.984398	0.0156017	1
				1.25893e-09	8.9	0.987567	0.0124327	1
				1e-09	9	0.990099	0.00990099	1
				7.94328e-10	9.1	0.992119	0.00788068	1
				6.30957e-10	9.2	0.99373	0.00627001	1
				5.01187e-10	9.3	0.995013	0.00498688	1
				3.98107e-10	9.4	0.996035	0.00396529	1
				3.16228e-10	9.5	0.996848	0.00315231	1
				2.51189e-10	9.6	0.997494	0.00250559	1
				1.99526e-10	9.7	0.998009	0.00199129	1
				1.58489e-10	9.8	0.998418	0.00158239	1
				1.25893e-10	9.9	0.998743	0.00125734	1
				1e-10	10	0.999001	0.000999001	1

## Sheet: Simple PCET
Molar gas constant	R (J/mol/K)	8.314		pH 7	E (V) vs SHE	E (mV) vs SHE	α	Ox	Red	OxH	RedH	Total Ox	Total Red	Total									Molar gas constant	R (J/mol/K)	8.314	pH 8	E (V) vs SHE	E (mV) vs SHE	α	Ox	Red	OxH	RedH	Total Ox	Total Red	Total									Molar gas constant	R (J/mol/K)	8.314	pH 6	E (V) vs SHE
Temperature	T (K)	298			-0.2	-200	4.16449e-05	0.908712	3.78432e-05	0.0908712	0.000378432	0.999584	0.000416275	1									Temperature	T (K)	298		-0.2	-200	4.16449e-05	0.990017	4.12291e-05	0.00990017	4.12291e-05	0.999918	8.24583e-05	1									Temperature	T (K)	298		-0.2
number of electrons	n	1			-0.21	-210	6.14738e-05	0.908532	5.5851e-05	0.0908532	0.00055851	0.999386	0.000614361	1									number of electrons	n	1		-0.21	-210	6.14738e-05	0.989978	6.08578e-05	0.00989978	6.08578e-05	0.999878	0.000121716	1									number of electrons	n	1		-0.21
Faraday constant	F (J/V)	96485			-0.22	-220	9.07443e-05	0.908267	8.242e-05	0.0908267	0.0008242	0.999093	0.00090662	1									Faraday constant	F (J/V)	96485		-0.22	-220	9.07443e-05	0.989921	8.98297e-05	0.00989921	8.98297e-05	0.99982	0.000179659	1									Faraday constant	F (J/V)	96485		-0.22
Redox potential	E1 (V) vs SHE	-0.459	Average		-0.23	-230	0.000133952	0.907875	0.000121611	0.0907875	0.00121611	0.998662	0.00133772	1									Redox potential	E1 (V) vs SHE	-0.459	Average	-0.23	-230	0.000133952	0.989836	0.00013259	0.00989836	0.00013259	0.999735	0.000265181	1									Redox potential	E1 (V) vs SHE	-0.459	Average	-0.23
Redox potential	E2 (V) vs SHE	-0.340747	-0.399873		-0.24	-240	0.000197732	0.907297	0.000179402	0.0907297	0.00179402	0.998027	0.00197342	1									Redox potential	E2 (V) vs SHE	-0.340747	-0.399873	-0.24	-240	0.000197732	0.989711	0.000195698	0.00989711	0.000195698	0.999609	0.000391395	1									Redox potential	E2 (V) vs SHE	-0.340747	-0.399873	-0.24
	pKa,1	6			-0.25	-250	0.000291881	0.906445	0.000264574	0.0906445	0.00264574	0.99709	0.00291032	1										pKa,1	6		-0.25	-250	0.000291881	0.989527	0.000288824	0.00989527	0.000288824	0.999422	0.000577648	1										pKa,1	6		-0.25
	pKa,2	8			-0.26	-260	0.000430859	0.905191	0.000390009	0.0905191	0.00390009	0.99571	0.0042901	1										pKa,2	8		-0.26	-260	0.000430859	0.989255	0.000426229	0.00989255	0.000426229	0.999148	0.000852458	1										pKa,2	8		-0.26
	Ka,1	1e-06			-0.27	-270	0.00063601	0.903346	0.000574537	0.0903346	0.00574537	0.99368	0.0063199	1										Ka,1	1e-06		-0.27	-270	0.00063601	0.988854	0.000628921	0.00988854	0.000628921	0.998742	0.00125784	1										Ka,1	1e-06		-0.27
	Ka,2	1e-08			-0.28	-280	0.000938842	0.900635	0.000845555	0.0900635	0.00845555	0.990699	0.0093011	1										Ka,2	1e-08		-0.28	-280	0.000938842	0.988262	0.000927822	0.00988262	0.000927822	0.998144	0.00185564	1										Ka,2	1e-08		-0.28
	pH	7			-0.29	-290	0.00138587	0.896664	0.00124266	0.0896664	0.0124266	0.986331	0.0136692	1										pH	8		-0.29	-290	0.00138587	0.987389	0.00136839	0.00987389	0.00136839	0.997263	0.00273678	1										pH	6		-0.29
	[H+] (M)	1e-07			-0.3	-300	0.00204574	0.890866	0.00182248	0.0890866	0.0182248	0.979953	0.0200473	1										[H+] (M)	1e-08		-0.3	-300	0.00204574	0.986104	0.00201731	0.00986104	0.00201731	0.995965	0.00403463	1										[H+] (M)	1e-06		-0.3
					-0.31	-310	0.00301981	0.882443	0.00266481	0.0882443	0.0266481	0.970687	0.0293129	1													-0.31	-310	0.00301981	0.984214	0.00297214	0.00984214	0.00297214	0.994056	0.00594427	1													-0.31
		E1			-0.32	-320	0.00445767	0.870296	0.0038795	0.0870296	0.038795	0.957326	0.0426744	1													-0.32	-320	0.00445767	0.981436	0.00437492	0.00981436	0.00437492	0.99125	0.00874984	1													-0.32
	Ox	⇌	Red		-0.33	-330	0.00658017	0.852964	0.00561265	0.0852964	0.0561265	0.938261	0.0617392	1													-0.33	-330	0.00658017	0.977364	0.00643122	0.00977364	0.00643122	0.987138	0.0128624	1													-0.33
K1	⇅		⇅	K2	-0.34	-340	0.00971328	0.828606	0.00804849	0.0828606	0.0804849	0.911467	0.0885333	1													-0.34	-340	0.00971328	0.971415	0.00943563	0.00971415	0.00943563	0.981129	0.0188713	1													-0.34
	OxH	⇌	RedH		-0.35	-350	0.0143382	0.795089	0.0114002	0.0795089	0.114002	0.874598	0.125402	1													-0.35	-350	0.0143382	0.962764	0.0138043	0.00962764	0.0138043	0.972391	0.0276086	1													-0.35
		E2			-0.36	-360	0.0211653	0.75029	0.0158801	0.075029	0.158801	0.825319	0.174681	1													-0.36	-360	0.0211653	0.950272	0.0201128	0.00950272	0.0201128	0.959774	0.0402255	1													-0.36
					-0.37	-370	0.031243	0.692678	0.0216413	0.0692678	0.216413	0.761945	0.238055	1													-0.37	-370	0.031243	0.932413	0.0291314	0.00932413	0.0291314	0.941737	0.0582628	1													-0.37
					-0.38	-380	0.0461192	0.622157	0.0286934	0.0622157	0.286934	0.684373	0.315627	1													-0.38	-380	0.0461192	0.907245	0.0418414	0.00907245	0.0418414	0.916317	0.0836828	1													-0.38
					-0.39	-390	0.0680786	0.540873	0.0368218	0.0540873	0.368218	0.59496	0.40504	1													-0.39	-390	0.0680786	0.872481	0.0593973	0.00872481	0.0593973	0.881205	0.118795	1													-0.39
					-0.4	-400	0.100494	0.453426	0.0455665	0.0453426	0.455665	0.498768	0.501232	1													-0.4	-400	0.100494	0.825772	0.082985	0.00825772	0.082985	0.83403	0.16597	1													-0.4
					-0.41	-410	0.148343	0.366062	0.0543029	0.0366062	0.543029	0.402668	0.597332	1													-0.41	-410	0.148343	0.765294	0.113526	0.00765294	0.113526	0.772947	0.227053	1													-0.41
					-0.42	-420	0.218976	0.285003	0.0624088	0.0285003	0.624088	0.313503	0.686497	1													-0.42	-420	0.218976	0.69063	0.151232	0.0069063	0.151232	0.697537	0.302463	1													-0.42
					-0.43	-430	0.323241	0.214793	0.0694298	0.0214793	0.694298	0.236272	0.763728	1													-0.43	-430	0.323241	0.603689	0.195137	0.00603689	0.195137	0.609726	0.390274	1													-0.43
					-0.44	-440	0.47715	0.157514	0.0751577	0.0157514	0.751577	0.173265	0.826735	1													-0.44	-440	0.47715	0.509087	0.242911	0.00509087	0.242911	0.514178	0.485822	1													-0.44
					-0.45	-450	0.704343	0.113023	0.0796068	0.0113023	0.796068	0.124325	0.875675	1													-0.45	-450	0.704343	0.413448	0.291209	0.00413448	0.291209	0.417582	0.582418	1													-0.45
					-0.46	-460	1.03971	0.079765	0.0829326	0.0079765	0.829326	0.0877415	0.912259	1													-0.46	-460	1.03971	0.323685	0.336539	0.00323685	0.336539	0.326922	0.673078	1													-0.46
					-0.47	-470	1.53476	0.0556099	0.0853481	0.00556099	0.853481	0.0611709	0.938829	1													-0.47	-470	1.53476	0.245126	0.376211	0.00245126	0.376211	0.247578	0.752422	1													-0.47
					-0.48	-480	2.26553	0.0384307	0.087066	0.00384307	0.87066	0.0422737	0.957726	1													-0.48	-480	2.26553	0.180471	0.408862	0.00180471	0.408862	0.182275	0.817725	1													-0.48
					-0.49	-490	3.34426	0.0263944	0.0882697	0.00263944	0.882697	0.0290338	0.970966	1													-0.49	-490	3.34426	0.129895	0.434403	0.00129895	0.434403	0.131194	0.868806	1													-0.49
					-0.5	-500	4.93661	0.0180497	0.0891041	0.00180497	0.891041	0.0198546	0.980145	1													-0.5	-500	4.93661	0.0918846	0.453598	0.000918846	0.453598	0.0928035	0.907197	1													-0.5
					-0.51	-510	7.28714	0.0123064	0.0896785	0.00123064	0.896785	0.013537	0.986463	1													-0.51	-510	7.28714	0.0641672	0.467596	0.000641672	0.467596	0.0648089	0.935191	1													-0.51
					-0.52	-520	10.7569	0.00837341	0.0900718	0.000837341	0.900718	0.00921075	0.990789	1													-0.52	-520	10.7569	0.0443976	0.477579	0.000443976	0.477579	0.0448415	0.955158	1													-0.52
					-0.53	-530	15.8787	0.00568939	0.0903402	0.000568939	0.903402	0.00625833	0.993742	1													-0.53	-530	15.8787	0.0305181	0.484588	0.000305181	0.484588	0.0308233	0.969177	1													-0.53
					-0.54	-540	23.4393	0.00386202	0.0905229	0.000386202	0.905229	0.00424822	0.995752	1													-0.54	-540	23.4393	0.0208818	0.489455	0.000208818	0.489455	0.0210906	0.978909	1													-0.54
					-0.55	-550	34.5998	0.00261988	0.0906471	0.000261988	0.906471	0.00288186	0.997118	1													-0.55	-550	34.5998	0.0142431	0.492807	0.000142431	0.492807	0.0143855	0.985614	1													-0.55
					-0.56	-560	51.0742	0.00177646	0.0907314	0.000177646	0.907314	0.00195411	0.998046	1													-0.56	-560	51.0742	0.00969382	0.495105	9.69382e-05	0.495105	0.00979076	0.990209	1													-0.56
					-0.57	-570	75.393	0.00120421	0.0907887	0.000120421	0.907887	0.00132463	0.998675	1													-0.57	-570	75.393	0.00658779	0.496673	6.58779e-05	0.496673	0.00665367	0.993346	1													-0.57
					-0.58	-580	111.291	0.000816127	0.0908275	8.16127e-05	0.908275	0.000897739	0.999102	1													-0.58	-580	111.291	0.00447244	0.497741	4.47244e-05	0.497741	0.00451716	0.995483	1													-0.58
					-0.59	-590	164.281	0.000553037	0.0908538	5.53037e-05	0.908538	0.000608341	0.999392	1													-0.59	-590	164.281	0.00303423	0.498468	3.03423e-05	0.498468	0.00306457	0.996935	1													-0.59
					-0.6	-600	242.503	0.000374723	0.0908716	3.74723e-05	0.908716	0.000412196	0.999588	1													-0.6	-600	242.503	0.00205754	0.498961	2.05754e-05	0.498961	0.00207812	0.997922	1													-0.6
[truncated: 23 more columns]

## Sheet: Simple Redox Anticooperativity
Molar gas constant	R (J/mol/K)	8.314		100 mV anticooperativity		E (V) vs SHE	E (mV) vs SHE	α	β	γ	OxOx	OxRed	RedOx	RedRed	Total									Molar gas constant	R (J/mol/K)	8.314	No anticooperativity	E (V) vs SHE	E (mV) vs SHE	α	β	γ	OxOx	OxRed	RedOx	RedRed	Total
Temperature	T (K)	298				-0.2	-200	0.00428741	0.0019676	4.00542e-05	0.993784	0.00426076	0.00195537	1.70662e-07	1									Temperature	T (K)	298		-0.2	-200	0.000611717	0.000280733	0.000280733	0.999108	0.000611172	0.000280482	1.71576e-07	1
number of electrons	n	1				-0.21	-210	0.00632884	0.00290447	5.91259e-05	0.990851	0.00627094	0.00287789	3.70775e-07	1									number of electrons	n	1		-0.21	-210	0.000902983	0.000414402	0.000414402	0.998684	0.000901795	0.000413857	3.73706e-07	1
Faraday constant	F (J/V)	96485	Average			-0.22	-220	0.00934229	0.00428741	8.72783e-05	0.986553	0.00921666	0.00422976	8.04414e-07	1									Faraday constant	F (J/V)	96485	Average	-0.22	-220	0.00133293	0.000611717	0.000611717	0.998058	0.00133035	0.00061053	8.13796e-07	1
Redox potential	E1 (V) vs SHE	-0.34	-0.4			-0.23	-230	0.0137906	0.00632884	0.000128835	0.980276	0.0135186	0.00620401	1.74167e-06	1									Redox potential	E1 (V) vs SHE	-0.39	-0.4	-0.23	-230	0.0019676	0.000902983	0.000902983	0.997136	0.00196197	0.000900397	1.77162e-06	1
Redox potential	E2 (V) vs SHE	-0.36				-0.24	-240	0.0203569	0.00934229	0.00019018	0.971154	0.0197697	0.0090728	3.75979e-06	1									Redox potential	E2 (V) vs SHE	-0.41		-0.24	-240	0.00290447	0.00133293	0.00133293	0.995777	0.0028922	0.0013273	3.85511e-06	1
	E3 (V) vs SHE	-0.46				-0.25	-250	0.0300497	0.0137906	0.000280733	0.957993	0.0287874	0.0132113	8.08156e-06	1										E3 (V) vs SHE	-0.41		-0.25	-250	0.00428741	0.0019676	0.0019676	0.993776	0.00426073	0.00195536	8.38342e-06	1
	E4 (V) vs SHE	-0.44				-0.26	-260	0.0443577	0.0203569	0.000414402	0.939203	0.0416608	0.0191192	1.72643e-05	1										E4 (V) vs SHE	-0.39		-0.26	-260	0.00632884	0.00290447	0.00290447	0.990833	0.00627083	0.00287784	1.82134e-05	1
						-0.27	-270	0.0654783	0.0300497	0.000611717	0.912768	0.0597666	0.0274284	3.65603e-05	1													-0.27	-270	0.00934229	0.00428741	0.00428741	0.986515	0.0092163	0.0042296	3.95141e-05	1
			E1			-0.28	-280	0.0966555	0.0443577	0.000902983	0.876347	0.0847038	0.0388727	7.64861e-05	1													-0.28	-280	0.0137906	0.00632884	0.00632884	0.980194	0.0135174	0.00620349	8.55496e-05	1
		OxOx	⇌	OxRed		-0.29	-290	0.142678	0.0654783	0.00133293	0.827578	0.118077	0.0541884	0.000157388	1													-0.29	-290	0.0203569	0.00934229	0.00934229	0.970978	0.0197661	0.00907116	0.00018466	1
	E2	⇅		⇅	E3	-0.3	-300	0.210613	0.0966555	0.0019676	0.764712	0.161058	0.0739136	0.000316898	1													-0.3	-300	0.0300497	0.0137906	0.0137906	0.957621	0.0287762	0.0132061	0.00039684	1
		RedOx	⇌	RedRed		-0.31	-310	0.310895	0.142678	0.00290447	0.687533	0.21375	0.0980955	0.000620831	1													-0.31	-310	0.0443577	0.0203569	0.0203569	0.938423	0.0416263	0.0191034	0.00084738	1
			E4			-0.32	-320	0.458926	0.210613	0.00428741	0.598263	0.274558	0.126002	0.00117714	1													-0.32	-320	0.0654783	0.0300497	0.0300497	0.911165	0.0596616	0.0273802	0.00179281	1
						-0.33	-330	0.67744	0.310895	0.00632884	0.501851	0.339974	0.156023	0.00215164	1													-0.33	-330	0.0966555	0.0443577	0.0443577	0.873133	0.0843931	0.0387302	0.00374348	1
						-0.34	-340	1	0.458926	0.00934229	0.405142	0.405142	0.18593	0.00378496	1													-0.34	-340	0.142678	0.0654783	0.0654783	0.821356	0.117189	0.0537811	0.00767335	1
						-0.35	-350	1.47614	0.67744	0.0137906	0.315066	0.465082	0.213438	0.00641375	1													-0.35	-350	0.210613	0.0966555	0.0966555	0.753225	0.158639	0.0728033	0.0153333	1
						-0.36	-360	2.179	1	0.0203569	0.236778	0.515941	0.236778	0.0105029	1													-0.36	-360	0.310895	0.142678	0.142678	0.667588	0.20755	0.0952498	0.0296127	1
						-0.37	-370	3.21652	1.47614	0.0300497	0.172732	0.555596	0.254977	0.0166955	1													-0.37	-370	0.458926	0.210613	0.210613	0.566189	0.259839	0.119247	0.0547253	1
						-0.38	-380	4.74805	2.179	0.0443577	0.122885	0.583466	0.267767	0.0258812	1													-0.38	-380	0.67744	0.310895	0.310895	0.454763	0.308075	0.141383	0.0957788	1
						-0.39	-390	7.00881	3.21652	0.0654783	0.0855852	0.599851	0.275287	0.0392772	1													-0.39	-390	1	0.458926	0.458926	0.342718	0.342718	0.157282	0.157282	1
						-0.4	-400	10.346	4.74805	0.0966555	0.0584998	0.60524	0.27776	0.0584998	1													-0.4	-400	1.47614	0.67744	0.67744	0.240756	0.35539	0.163098	0.240756	1
						-0.41	-410	15.2722	7.00881	0.142678	0.0392772	0.599851	0.275287	0.0855852	1													-0.41	-410	2.179	1	1	0.157282	0.342718	0.157282	0.342718	1
						-0.42	-420	22.544	10.346	0.210613	0.0258812	0.583466	0.267767	0.122885	1													-0.42	-420	3.21652	1.47614	1.47614	0.0957788	0.308075	0.141383	0.454763	1
						-0.43	-430	33.2782	15.2722	0.310895	0.0166955	0.555596	0.254977	0.172732	1													-0.43	-430	4.74805	2.179	2.179	0.0547253	0.259839	0.119247	0.566189	1
						-0.44	-440	49.1235	22.544	0.458926	0.0105029	0.515941	0.236778	0.236778	1													-0.44	-440	7.00881	3.21652	3.21652	0.0296127	0.20755	0.0952498	0.667588	1
						-0.45	-450	72.5133	33.2782	0.67744	0.00641375	0.465082	0.213438	0.315066	1													-0.45	-450	10.346	4.74805	4.74805	0.0153333	0.158639	0.0728033	0.753225	1
						-0.46	-460	107.04	49.1235	1	0.00378496	0.405142	0.18593	0.405142	1													-0.46	-460	15.2722	7.00881	7.00881	0.00767335	0.117189	0.0537811	0.821356	1
						-0.47	-470	158.007	72.5133	1.47614	0.00215164	0.339974	0.156023	0.501851	1													-0.47	-470	22.544	10.346	10.346	0.00374348	0.0843931	0.0387302	0.873133	1
						-0.48	-480	233.241	107.04	2.179	0.00117714	0.274558	0.126002	0.598263	1													-0.48	-480	33.2782	15.2722	15.2722	0.00179281	0.0596616	0.0273802	0.911165	1
						-0.49	-490	344.297	158.007	3.21652	0.000620831	0.21375	0.0980955	0.687533	1													-0.49	-490	49.1235	22.544	22.544	0.00084738	0.0416263	0.0191034	0.938423	1
						-0.5	-500	508.232	233.241	4.74805	0.000316898	0.161058	0.0739136	0.764712	1													-0.5	-500	72.5133	33.2782	33.2782	0.00039684	0.0287762	0.0132061	0.957621	1
						-0.51	-510	750.225	344.297	7.00881	0.000157388	0.118077	0.0541884	0.827578	1													-0.51	-510	107.04	49.1235	49.1235	0.00018466	0.0197661	0.00907116	0.970978	1
						-0.52	-520	1107.44	508.232	10.346	7.64861e-05	0.0847038	0.0388727	0.876347	1													-0.52	-520	158.007	72.5133	72.5133	8.55496e-05	0.0135174	0.00620349	0.980194	1
						-0.53	-530	1634.74	750.225	15.2722	3.65603e-05	0.0597666	0.0274284	0.912768	1													-0.53	-530	233.241	107.04	107.04	3.95141e-05	0.0092163	0.0042296	0.986515	1
						-0.54	-540	2413.12	1107.44	22.544	1.72643e-05	0.0416608	0.0191192	0.939203	1													-0.54	-540	344.297	158.007	158.007	1.82134e-05	0.00627083	0.00287784	0.990833	1
						-0.55	-550	3562.11	1634.74	33.2782	8.08156e-06	0.0287874	0.0132113	0.957993	1													-0.55	-550	508.232	233.241	233.241	8.38342e-06	0.00426073	0.00195536	0.993776	1
						-0.56	-560	5258.18	2413.12	49.1235	3.75979e-06	0.0197697	0.0090728	0.971154	1													-0.56	-560	750.225	344.297	344.297	3.85511e-06	0.0028922	0.0013273	0.995777	1
						-0.57	-570	7761.84	3562.11	72.5133	1.74167e-06	0.0135186	0.00620401	0.980276	1													-0.57	-570	1107.44	508.232	508.232	1.77162e-06	0.00196197	0.000900397	0.997136	1
						-0.58	-580	11457.6	5258.18	107.04	8.04414e-07	0.00921666	0.00422976	0.986553	1													-0.58	-580	1634.74	750.225	750.225	8.13796e-07	0.00133035	0.00061053	0.998058	1
						-0.59	-590	16913.1	7761.84	158.007	3.70775e-07	0.00627094	0.00287789	0.990851	1													-0.59	-590	2413.12	1107.44	1107.44	3.73706e-07	0.000901795	0.000413857	0.998684	1
						-0.6	-600	24966.1	11457.6	233.241	1.70662e-07	0.00426076	0.00195537	0.993784	1													-0.6	-600	3562.11	1634.74	1634.74	1.71576e-07	0.000611172	0.000280482	0.999108	1

## Sheet: Simple H2ase model
Molar gas constant	R (J/mol/K)	8.314				pH 7	E (V) vs SHE	E (mV) vs SHE	α	β	γ	δ	Ox	Red	Sred	OxH	RedH	SredH	Total Ox	Total Red	Total Sred	Total									Molar gas constant	R (J/mol/K)	8.314	pH 8	E (V) vs SHE	E (mV) vs SHE	α	β	γ	δ	Ox	Red	Sred	OxH	RedH	SredH	Total Ox	Total Red	Total Sred
Temperature	T (K)	298					-0.2	-200	0.00133293	3.49587e-09	49.1235	0.000128835	0.99709	0.00132906	4.6462e-12	3.15308e-05	0.0015489	1.99553e-07	0.997122	0.00287796	1.99558e-07	1									Temperature	T (K)	298		-0.2	-200	0.00133293	3.49587e-09	49.1235	0.000128835	0.998511	0.00133095	4.65282e-12	3.15757e-06	0.000155111	1.99838e-08	0.998514	0.00148606	1.99884e-08
number of electrons	n	1					-0.21	-210	0.0019676	5.16041e-09	72.5133	0.00019018	0.995726	0.00195919	1.01102e-11	3.14876e-05	0.00228327	4.34232e-07	0.995757	0.00424246	4.34242e-07	1									number of electrons	n	1		-0.21	-210	0.0019676	5.16041e-09	72.5133	0.00019018	0.997805	0.00196328	1.01313e-11	3.15534e-06	0.000228804	4.35139e-08	0.997808	0.00219209	4.3524e-08
Faraday constant	F (J/V)	96485					-0.22	-220	0.00290447	7.6175e-09	107.04	0.000280733	0.993718	0.00288622	2.19858e-11	3.14241e-05	0.00336364	9.44285e-07	0.993749	0.00624986	9.44307e-07	1									Faraday constant	F (J/V)	96485		-0.22	-220	0.00290447	7.6175e-09	107.04	0.000280733	0.996764	0.00289507	2.20532e-11	3.15205e-06	0.000337396	9.4718e-08	0.996767	0.00323246	9.474e-08
Redox potential	E1 (V) vs SHE	-0.37	Average				-0.23	-230	0.00428741	1.12445e-08	158.007	0.000414402	0.990768	0.00424783	4.77649e-11	3.13308e-05	0.00495049	2.05149e-06	0.9908	0.00919832	2.05154e-06	1									Redox potential	E1 (V) vs SHE	-0.37	Average	-0.23	-230	0.00428741	1.12445e-08	158.007	0.000414402	0.995232	0.00426697	4.79801e-11	3.1472e-06	0.000497279	2.06074e-07	0.995236	0.00476425	2.06122e-07
Redox potential	E2 (V) vs SHE	-0.7	-0.4				-0.24	-240	0.00632884	1.65986e-08	233.241	0.000611717	0.986446	0.00624306	1.03626e-10	3.11941e-05	0.00727575	4.4507e-06	0.986477	0.0135188	4.45081e-06	1									Redox potential	E2 (V) vs SHE	-0.7	-0.4	-0.24	-240	0.00632884	1.65986e-08	233.241	0.000611717	0.99298	0.00628441	1.04312e-10	3.14008e-06	0.000732394	4.48018e-07	0.992983	0.00701681	4.48123e-07
	E3 (V) vs SHE	-0.1					-0.25	-250	0.00934229	2.45019e-08	344.297	0.000902983	0.980131	0.00915667	2.24356e-10	3.09945e-05	0.0106713	9.63602e-06	0.980162	0.019828	9.63624e-06	1										E3 (V) vs SHE	-0.1		-0.25	-250	0.00934229	2.45019e-08	344.297	0.000902983	0.989673	0.0092458	2.2654e-10	3.12962e-06	0.00107752	9.72982e-07	0.989676	0.0103233	9.73209e-07
	E4 (V) vs SHE	-0.43					-0.26	-260	0.0137906	3.61683e-08	508.232	0.00133293	0.970954	0.01339	4.84294e-10	3.07042e-05	0.0156049	2.08003e-05	0.970984	0.0289949	2.08008e-05	1										E4 (V) vs SHE	-0.43		-0.26	-260	0.0137906	3.61683e-08	508.232	0.00133293	0.984831	0.0135814	4.91215e-10	3.11431e-06	0.00158279	2.10976e-06	0.984834	0.0151642	2.11025e-06
	pKa,1	2.5					-0.27	-270	0.0203569	5.33897e-08	750.225	0.0019676	0.957708	0.0194959	1.04088e-09	3.02854e-05	0.0227208	4.47056e-05	0.957739	0.0422168	4.47067e-05	1										pKa,1	2.5		-0.27	-270	0.0203569	5.33897e-08	750.225	0.0019676	0.977768	0.0199043	1.06268e-09	3.09198e-06	0.00231968	4.5642e-06	0.977771	0.022224	4.56526e-06
	pKa,2	7.06648					-0.28	-280	0.0300497	7.88109e-08	1107.44	0.00290447	0.938788	0.0282103	2.22328e-09	2.96871e-05	0.0328767	9.54892e-05	0.938818	0.0610869	9.54914e-05	1										pKa,2	7.06648		-0.28	-280	0.0300497	7.88109e-08	1107.44	0.00290447	0.967525	0.0290738	2.29133e-09	3.05958e-06	0.0033883	9.84122e-06	0.967528	0.0324621	9.84351e-06
	pKa3	11.633					-0.29	-290	0.0443577	1.16336e-07	1634.74	0.00428741	0.912154	0.040461	4.70708e-09	2.88448e-05	0.0471539	0.000202168	0.912183	0.0876149	0.000202173	1										pKa3	11.633		-0.29	-290	0.0443577	1.16336e-07	1634.74	0.00428741	0.952787	0.0422634	4.91677e-09	3.01298e-06	0.00492544	2.11174e-05	0.95279	0.0471889	2.11223e-05
	Ka,1	0.00316228					-0.3	-300	0.0654783	1.71729e-07	2413.12	0.00632884	0.875425	0.0573214	9.84375e-09	2.76834e-05	0.0668032	0.000422787	0.875453	0.124125	0.000422796	1										Ka,1	0.00316228		-0.3	-300	0.0654783	1.71729e-07	2413.12	0.00632884	0.931827	0.0610145	1.0478e-08	2.9467e-06	0.00711071	4.50026e-05	0.93183	0.0681252	4.50131e-05
	Ka,2	8.58064e-08					-0.31	-310	0.0966555	2.53497e-07	3562.11	0.00934229	0.826185	0.0798553	2.02431e-08	2.61263e-05	0.0930645	0.000869435	0.826211	0.17292	0.000869455	1										Ka,2	8.58064e-08		-0.31	-310	0.0966555	2.53497e-07	3562.11	0.00934229	0.902504	0.087232	2.2113e-08	2.85397e-06	0.0101661	9.4975e-05	0.902507	0.0973981	9.49971e-05
	Ka,3	2.3283e-12					-0.32	-320	0.142678	3.74198e-07	5258.18	0.0137906	0.762613	0.108808	4.07157e-08	2.41159e-05	0.126806	0.00174873	0.762637	0.235614	0.00174877	1										Ka,3	2.3283e-12		-0.32	-320	0.142678	3.74198e-07	5258.18	0.0137906	0.862413	0.123047	4.60439e-08	2.72719e-06	0.0143401	0.000197758	0.862415	0.137387	0.000197804
	pH	7					-0.33	-330	0.210613	5.52371e-07	7761.84	0.0203569	0.68442	0.144147	7.96228e-08	2.16432e-05	0.167991	0.00341978	0.684441	0.312139	0.00341986	1										pH	8		-0.33	-330	0.210613	5.52371e-07	7761.84	0.0203569	0.809284	0.170445	9.4149e-08	2.55918e-06	0.0198639	0.000404368	0.809286	0.190309	0.000404462
	[H+] (M)	1e-07					-0.34	-340	0.310895	8.15379e-07	11457.6	0.0300497	0.593777	0.184602	1.50521e-07	1.87769e-05	0.215138	0.00646482	0.593795	0.39974	0.00646497	1										[H+] (M)	1e-08		-0.34	-340	0.310895	8.15379e-07	11457.6	0.0300497	0.741719	0.230597	1.88024e-07	2.34552e-06	0.0268741	0.000807557	0.741722	0.257471	0.000807745
							-0.35	-350	0.458926	1.20362e-06	16913.1	0.0443577	0.495658	0.22747	2.73787e-07	1.56741e-05	0.265097	0.0117591	0.495674	0.492567	0.0117594	1													-0.35	-350	0.458926	1.20362e-06	16913.1	0.0443577	0.660159	0.302964	3.64653e-07	2.08761e-06	0.0353079	0.00156617	0.660162	0.338272	0.00156654
		E1		E2			-0.36	-360	0.67744	1.77671e-06	24966.1	0.0654783	0.397035	0.268968	4.77879e-07	1.25554e-05	0.313459	0.0205248	0.397048	0.582427	0.0205253	1													-0.36	-360	0.67744	1.77671e-06	24966.1	0.0654783	0.567677	0.384568	6.83266e-07	1.79515e-06	0.0448181	0.00293461	0.567679	0.429386	0.0029353
	Ox	⇌	Red	⇌	Sred		-0.37	-370	1	2.62269e-06	36853.6	0.0966555	0.305055	0.305055	8.00065e-07	9.6467e-06	0.355516	0.0343626	0.305065	0.660571	0.0343634	1													-0.37	-370	1	2.62269e-06	36853.6	0.0966555	0.469966	0.469966	1.23257e-06	1.48616e-06	0.0547706	0.00529388	0.469968	0.524737	0.00529511
K1	⇅		⇅	K2	⇅	K3	-0.38	-380	1.47614	3.87146e-06	54401.3	0.142678	0.225126	0.332319	1.28656e-06	7.11912e-06	0.387289	0.0552574	0.225133	0.719608	0.0552587	1													-0.38	-380	1.47614	3.87146e-06	54401.3	0.142678	0.374149	0.552298	2.1382e-06	1.18316e-06	0.0643656	0.00918353	0.37415	0.616664	0.00918567
	OxH	⇌	RedH	⇌	SredH		-0.39	-390	2.179	5.71484e-06	80304.2	0.210613	0.159915	0.348455	1.99136e-06	5.05695e-06	0.406094	0.0855286	0.15992	0.754549	0.0855306	1													-0.39	-390	2.179	5.71484e-06	80304.2	0.210613	0.286825	0.624993	3.57173e-06	9.0702e-07	0.0728375	0.0153405	0.286826	0.69783	0.0153441
		E3		E4			-0.4	-400	3.21652	8.43593e-06	118541	0.310895	0.109522	0.35228	2.97181e-06	3.46339e-06	0.410553	0.127639	0.109526	0.762833	0.127642	1													-0.4	-400	3.21652	8.43593e-06	118541	0.310895	0.212407	0.683211	5.76352e-06	6.71688e-07	0.0796223	0.0247542	0.212407	0.762833	0.0247599
							-0.41	-410	4.74805	1.24527e-05	174983	0.458926	0.0723535	0.343538	4.27796e-06	2.28802e-06	0.400364	0.183737	0.0723558	0.743903	0.183742	1													-0.41	-410	4.74805	1.24527e-05	174983	0.458926	0.152546	0.724296	9.01941e-06	4.82392e-07	0.0844105	0.0387381	0.152546	0.808706	0.0387471
							-0.42	-420	7.00881	1.83819e-05	258300	0.67744	0.0460605	0.322829	5.93422e-06	1.45656e-06	0.37623	0.254873	0.0460619	0.699059	0.254879	1													-0.42	-420	7.00881	1.83819e-05	258300	0.67744	0.10662	0.747279	1.37364e-05	3.37162e-07	0.087089	0.0589976	0.10662	0.834368	0.0590113
							-0.43	-430	10.346	2.71344e-05	381289	1	0.0281999	0.291757	7.91663e-06	8.91759e-07	0.340017	0.340017	0.0282008	0.631774	0.340025	1													-0.43	-430	10.346	2.71344e-05	381289	1	0.0726861	0.752012	2.04054e-05	2.29854e-07	0.0876406	0.0876406	0.0726863	0.839653	0.087661
							-0.44	-440	15.2722	4.00542e-05	562837	1.47614	0.0165715	0.253084	1.01371e-05	5.24038e-07	0.294948	0.435386	0.0165721	0.548032	0.435396	1													-0.44	-440	15.2722	4.00542e-05	562837	1.47614	0.0483559	0.738502	2.95802e-05	1.52915e-07	0.0860661	0.127046	0.0483561	0.824568	0.127076
							-0.45	-450	22.544	5.91259e-05	830829	2.179	0.00933989	0.210559	1.24495e-05	2.95353e-07	0.245388	0.534701	0.00934018	0.455946	0.534713	1													-0.45	-450	22.544	5.91259e-05	830829	2.179	0.0313503	0.706762	4.17879e-05	9.91385e-08	0.0823671	0.179478	0.0313504	0.78913	0.17952
							-0.46	-460	33.2782	8.72783e-05	1.22642e+06	3.21652	0.00505535	0.168233	1.46831e-05	1.59864e-07	0.196061	0.630636	0.00505551	0.364294	0.63065	1													-0.46	-460	33.2782	8.72783e-05	1.22642e+06	3.21652	0.0197496	0.65723	5.7362e-05	6.24536e-08	0.0765946	0.246368	0.0197496	0.733825	0.246426
							-0.47	-470	49.1235	0.000128835	1.81038e+06	4.74805	0.00263712	0.129545	1.66899e-05	8.33931e-08	0.150973	0.716828	0.00263721	0.280518	0.716845	1													-0.47	-470	49.1235	0.000128835	1.81038e+06	4.74805	0.0120428	0.591586	7.62172e-05	3.80828e-08	0.0689442	0.327351	0.0120429	0.66053	0.327427
							-0.48	-480	72.5133	0.00019018	2.67238e+06	7.00881	0.00133274	0.0966411	1.83792e-05	4.21448e-08	0.112627	0.789381	0.00133278	0.209268	0.789399	1													-0.48	-480	72.5133	0.00019018	2.67238e+06	7.00881	0.00708175	0.513521	9.76613e-05	2.23945e-08	0.0598465	0.419453	0.00708177	0.573368	0.419551
							-0.49	-490	107.04	0.000280733	3.94482e+06	10.346	0.000656408	0.070262	1.97248e-05	2.07574e-08	0.0818844	0.847177	0.000656429	0.152146	0.847197	1													-0.49	-490	107.04	0.000280733	3.94482e+06	10.346	0.00400629	0.428834	0.000120388	1.2669e-08	0.0499769	0.517062	0.0040063	0.478811	0.517183
							-0.5	-500	158.007	0.000414402	5.82312e+06	15.2722	0.000316908	0.0500735	2.07506e-05	1.00215e-08	0.0583564	0.891232	0.000316918	0.10843	0.891253	1													-0.5	-500	158.007	0.000414402	5.82312e+06	15.2722	0.00218001	0.344456	0.000142743	6.89378e-09	0.0401434	0.613078	0.00218001	0.384599	0.613221
							-0.51	-510	233.241	0.000611717	8.59577e+06	22.544	0.000150735	0.0351575	2.15065e-05	4.76665e-09	0.0409731	0.923697	0.00015074	0.0761306	0.923719	1													-0.51	-510	233.241	0.000611717	8.59577e+06	22.544	0.00114369	0.266755	0.000163179	3.61667e-09	0.0310881	0.70085	0.00114369	0.297844	0.701013
							-0.52	-520	344.297	0.000902983	1.26886e+07	33.2782	7.09235e-05	0.0244187	2.20497e-05	2.2428e-09	0.028458	0.94703	7.09257e-05	0.0528767	0.947052	1													-0.52	-520	344.297	0.000902983	1.26886e+07	33.2782	0.000581051	0.200054	0.000180646	1.83745e-09	0.0233146	0.775869	0.000581053	0.223369	0.77605
							-0.53	-530	508.232	0.00133293	1.87302e+07	49.1235	3.31147e-05	0.0168299	2.24332e-05	1.04718e-09	0.0196139	0.963501	3.31157e-05	0.0364438	0.963523	1													-0.53	-530	508.232	0.00133293	1.87302e+07	49.1235	0.000287461	0.146097	0.000194738	9.09032e-10	0.0170264	0.836394	0.000287462	0.163124	0.836589
							-0.54	-540	750.225	0.0019676	2.76485e+07	72.5133	1.53782e-05	0.0115371	2.27005e-05	4.86302e-10	0.0134455	0.974979	1.53787e-05	0.0249826	0.975002	1													-0.54	-540	750.225	0.0019676	2.76485e+07	72.5133	0.000139273	0.104486	0.000205587	4.4042e-10	0.012177	0.882992	0.000139274	0.116663	0.883198
							-0.55	-550	1107.44	0.00290447	4.08132e+07	107.04	7.11485e-06	0.00787927	2.28851e-05	2.24991e-10	0.00918261	0.982908	7.11507e-06	0.0170619	0.982931	1													-0.55	-550	1107.44	0.00290447	4.08132e+07	107.04	6.64204e-05	0.0735566	0.000213643	2.1004e-10	0.0085724	0.917591	6.64206e-05	0.082129	0.917805
							-0.56	-560	1634.74	0.00428741	6.02462e+07	158.007	3.28327e-06	0.00536729	2.30118e-05	1.03826e-10	0.00625512	0.988351	3.28337e-06	0.0116224	0.988374	1													-0.56	-560	1634.74	0.00428741	6.02462e+07	158.007	3.13127e-05	0.0511881	0.000219465	9.90194e-11	0.00596554	0.942596	3.13128e-05	0.0571537	0.942815
							-0.57	-570	2413.12	0.00632884	8.89321e+07	233.241	1.51245e-06	0.00364971	2.30984e-05	4.78278e-11	0.00425342	0.992072	1.5125e-06	0.00790313	0.992095	1													-0.57	-570	2413.12	0.00632884	8.89321e+07	233.241	1.46403e-05	0.0353288	0.00022359	4.62968e-11	0.00411727	0.960316	1.46404e-05	0.0394461	0.960539
							-0.58	-580	3562.11	0.00934229	1.31277e+08	344.297	6.95875e-07	0.00247878	2.31575e-05	2.20055e-11	0.00288881	0.994609	6.95897e-07	0.00536759	0.994632	1													-0.58	-580	3562.11	0.00934229	1.31277e+08	344.297	6.80547e-06	0.0242418	0.000226474	2.15208e-11	0.00282517	0.9727	6.80549e-06	0.027067	0.972926
							-0.59	-590	5258.18	0.0137906	1.93783e+08	508.232	3.19909e-07	0.00168214	2.31977e-05	1.01164e-11	0.00196039	0.996334	3.19919e-07	0.00364253	0.996357	1													-0.59	-590	5258.18	0.0137906	1.93783e+08	508.232	3.15072e-06	0.0165671	0.000228469	9.96346e-12	0.00193075	0.981271	3.15073e-06	0.0184978	0.981499
							-0.6	-600	7761.84	0.0203569	2.86052e+08	750.225	1.46987e-07	0.00114089	2.3225e-05	4.64814e-12	0.00132961	0.997506	1.46992e-07	0.0024705	0.997529	1													-0.6	-600	7761.84	0.0203569	2.86052e+08	750.225	1.45463e-06	0.0112906	0.000229841	4.59994e-12	0.00131582	0.987162	1.45463e-06	0.0126064	0.987392
[truncated: 41 more columns]

## Sheet: H2ase model + anticoop
										Molar gas constant	R (J/mol/K)	8.314		pH 7	E (V) vs SHE	E (mV) vs SHE	α1	α2	α3	α4	α5	α6	α7	α8	α9	OxOx	OxRed	OxSred	OxOxH	OxRedH	OxSredH	RedOx	RedRed	RedSred	RedOxH	RedRedH	RedSredH	Total	Ox	Red	Sred	OxH	RedH	SredH
										Temperature	T (K)	298			-0.2	-200	0.00133293	3.49587e-09	49.1235	0.000128835	2.71344e-05	3.49587e-09	49.1235	2.62269e-06	0.00133293	0.995765	0.00132729	4.64003e-12	3.14888e-05	0.00154684	1.99288e-07	0.00132729	3.60151e-08	1.25904e-16	4.19726e-08	2.06184e-06	5.40755e-12	1	0.997092	0.00132732	4.64015e-12	3.15308e-05	0.0015489	1.99293e-07
										number of electrons	n	1			-0.21	-210	0.0019676	5.16041e-09	72.5133	0.00019018	4.00542e-05	5.16041e-09	72.5133	3.87146e-06	0.0019676	0.993774	0.00195535	1.00904e-11	3.14259e-05	0.0022788	4.33381e-07	0.00195535	7.83202e-08	4.04164e-16	6.18337e-08	4.48377e-06	1.73587e-11	1	0.995729	0.00195543	1.00908e-11	3.14877e-05	0.00228328	4.33398e-07
										Faraday constant	F (J/V)	96485			-0.22	-220	0.00290447	7.6175e-09	107.04	0.000280733	5.91259e-05	7.6175e-09	107.04	5.71484e-06	0.00290447	0.990848	0.00287789	2.19223e-11	3.13334e-05	0.00335393	9.41558e-07	0.00287789	1.70157e-07	1.29618e-15	9.10067e-08	9.74138e-06	5.56704e-11	1	0.993726	0.00287806	2.19236e-11	3.14244e-05	0.00336367	9.41613e-07
										Redox potential	E1 (V) vs SHE	-0.37	Average		-0.23	-230	0.00428741	1.12445e-08	158.007	0.000414402	8.72783e-05	1.12445e-08	158.007	8.43593e-06	0.00428741	0.986556	0.00422977	4.75619e-11	3.11976e-05	0.00492944	2.04277e-06	0.00422977	3.69168e-07	4.15112e-15	1.33757e-07	2.11345e-05	1.7829e-10	1	0.990786	0.00423014	4.7566e-11	3.13314e-05	0.00495057	2.04295e-06
										Redox potential	E2 (V) vs SHE	-0.7	-0.4		-0.24	-240	0.00632884	1.65986e-08	233.241	0.000611717	0.000128835	1.65986e-08	233.241	1.24527e-05	0.00632884	0.980279	0.00620403	1.02978e-10	3.09992e-05	0.00723027	4.42288e-06	0.00620403	7.99299e-07	1.32672e-14	1.96189e-07	4.57592e-05	5.69824e-10	1	0.986484	0.00620483	1.02991e-10	3.11953e-05	0.00727603	4.42345e-06
											E3 (V) vs SHE	-0.1			-0.25	-250	0.00934229	2.45019e-08	344.297	0.000902983	0.00019018	2.45019e-08	344.297	1.83819e-05	0.00934229	0.97114	0.00907267	2.22297e-10	3.07101e-05	0.0105734	9.54762e-06	0.00907267	1.72544e-06	4.22765e-14	2.86903e-07	9.87799e-05	1.81576e-09	1	0.980213	0.0090744	2.2234e-10	3.09971e-05	0.0106722	9.54944e-06
											E4 (V) vs SHE	-0.43			-0.26	-260	0.0137906	3.61683e-08	508.232	0.00133293	0.000280733	3.61683e-08	508.232	2.71344e-05	0.0137906	0.957917	0.0132102	4.77791e-10	3.0292e-05	0.0153954	2.0521e-05	0.0132102	3.70854e-06	1.34132e-13	4.17744e-07	0.000212311	5.76092e-09	1	0.971127	0.0132139	4.77925e-10	3.07097e-05	0.0156077	2.05268e-05
											E5 (V) vs SHE	-0.47			-0.27	-270	0.0203569	5.33897e-08	750.225	0.0019676	0.000414402	5.33897e-08	750.225	4.00542e-05	0.0203569	0.93896	0.0191143	1.02051e-09	2.96925e-05	0.0222761	4.38304e-05	0.0191143	7.921e-06	4.229e-13	6.04447e-07	0.000453471	1.81634e-08	1	0.958074	0.0191222	1.02093e-09	3.0297e-05	0.0227295	4.38486e-05
											E6 (V) vs SHE	-0.7			-0.28	-280	0.0300497	7.88109e-08	1107.44	0.00290447	0.000611717	7.88109e-08	1107.44	5.91259e-05	0.0300497	0.912138	0.0274095	2.16016e-09	2.88444e-05	0.0319434	9.27785e-05	0.0274095	1.67669e-05	1.32141e-12	8.66764e-07	0.000959889	5.67542e-08	1	0.939548	0.0274262	2.16149e-09	2.97111e-05	0.0329033	9.28353e-05
											E7 (V) vs SHE	-0.1			-0.29	-290	0.0443577	1.16336e-07	1634.74	0.00428741	0.000902983	1.16336e-07	1634.74	8.72783e-05	0.0443577	0.874892	0.0388082	4.5148e-09	2.76665e-05	0.0452276	0.000193909	0.0388082	3.50431e-05	4.07679e-12	1.22722e-06	0.00200619	1.75097e-07	1	0.9137	0.0388432	4.51887e-09	2.88937e-05	0.0472338	0.000194085
											E8 (V) vs SHE	-0.53			-0.3	-300	0.0654783	1.71729e-07	2413.12	0.00632884	0.00133293	1.71729e-07	2413.12	0.000128835	0.0654783	0.824493	0.0539864	9.27104e-09	2.60727e-05	0.0629165	0.000398189	0.0539864	7.19603e-05	1.23577e-11	1.7072e-06	0.00411967	5.30759e-07	1	0.878479	0.0540584	9.2834e-09	2.77799e-05	0.0670362	0.00039872
											E9 (V) vs SHE	-0.37			-0.31	-310	0.0966555	2.53497e-07	3562.11	0.00934229	0.0019676	2.53497e-07	3562.11	0.00019018	0.0966555	0.758655	0.0733282	1.85885e-08	2.39908e-05	0.0854577	0.000798371	0.0733282	0.000144281	3.65748e-11	2.31884e-06	0.00825996	1.57088e-06	1	0.831984	0.0734725	1.86251e-08	2.63096e-05	0.0937177	0.000799942
											E10 (V) vs SHE	-0.47			-0.32	-320	0.142678	3.74198e-07	5258.18	0.0137906	0.00290447	3.74198e-07	5258.18	0.000280733	0.142678	0.676541	0.0965271	3.61203e-08	2.13941e-05	0.112494	0.00155136	0.0965271	0.00028036	1.0491e-10	3.05246e-06	0.0160504	4.50587e-06	1	0.773068	0.0968075	3.62252e-08	2.44465e-05	0.128544	0.00155586
											E11 (V) vs SHE	-0.47			-0.33	-330	0.210613	5.52371e-07	7761.84	0.0203569	0.00428741	5.52371e-07	7761.84	0.000414402	0.210613	0.579935	0.122142	6.74675e-08	1.83392e-05	0.142346	0.00289771	0.122142	0.000523672	2.89261e-10	3.86246e-06	0.0299798	1.24237e-05	1	0.702077	0.122665	6.77567e-08	2.22016e-05	0.172325	0.00291014
											E12 (V) vs SHE	-0.37			-0.34	-340	0.310895	8.15379e-07	11457.6	0.0300497	0.00632884	8.15379e-07	11457.6	0.000611717	0.310895	0.473997	0.147363	1.20157e-07	1.49891e-05	0.171739	0.0051607	0.147363	0.000932637	7.60453e-10	4.66003e-06	0.0533927	3.26613e-05	1	0.62136	0.148296	1.20917e-07	1.96491e-05	0.225132	0.00519336
											E13 (V) vs SHE	-0.37			-0.35	-350	0.458926	1.20362e-06	16913.1	0.0443577	0.00934229	1.20362e-06	16913.1	0.000902983	0.458926	0.366781	0.168325	2.02599e-07	1.15986e-05	0.196169	0.00870159	0.168325	0.00157254	1.89274e-09	5.32291e-06	0.0900268	8.12927e-05	1	0.535107	0.169898	2.04492e-07	1.69216e-05	0.286196	0.00878288
											E14 (V) vs SHE	-0.47			-0.36	-360	0.67744	1.77671e-06	24966.1	0.0654783	0.0137906	1.77671e-06	24966.1	0.00133293	0.67744	0.267307	0.181084	3.21735e-07	8.45298e-06	0.211038	0.0138184	0.181084	0.00249725	4.43691e-09	5.72639e-06	0.142966	0.000190564	1	0.448391	0.183582	3.26172e-07	1.41794e-05	0.354004	0.014009
											pKa,1	2.5			-0.37	-370	1	2.62269e-06	36853.6	0.0966555	0.0203569	2.62269e-06	36853.6	0.0019676	1	0.182943	0.182943	4.79802e-07	5.78516e-06	0.213204	0.0206074	0.182943	0.00372414	9.76726e-09	5.78516e-06	0.213204	0.000419501	1	0.365886	0.186667	4.89569e-07	1.15703e-05	0.426408	0.0210269
											pKa,2	7.06648			-0.38	-380	1.47614	3.87146e-06	54401.3	0.142678	0.0300497	3.87146e-06	54401.3	0.00290447	1.47614	0.117518	0.173474	6.71598e-07	3.71625e-06	0.202169	0.028845	0.173474	0.00521284	2.01813e-08	5.48573e-06	0.298431	0.000866782	1	0.290992	0.178687	6.91779e-07	9.20198e-06	0.5006	0.0297117
											pKa3	11.633			-0.39	-390	2.179	5.71484e-06	80304.2	0.210613	0.0443577	5.71484e-06	80304.2	0.00428741	2.179	0.0709913	0.15469	8.8403e-07	2.24494e-06	0.180278	0.0379689	0.15469	0.0068617	3.92135e-08	4.89174e-06	0.392827	0.00168421	1	0.225682	0.161552	9.23244e-07	7.13668e-06	0.573105	0.0396531
											pKa,4	2.5			-0.4	-400	3.21652	8.43593e-06	118541	0.310895	0.0654783	8.43593e-06	118541	0.00632884	3.21652	0.0404997	0.130268	1.09893e-06	1.28071e-06	0.151817	0.047199	0.130268	0.00852975	7.19564e-08	4.11944e-06	0.488321	0.00309051	1	0.170768	0.138798	1.17089e-06	5.40016e-06	0.640138	0.0502895
											pKa,5	8.75777			-0.41	-410	4.74805	1.24527e-05	174983	0.458926	0.0966555	1.24527e-05	174983	0.00934229	4.74805	0.0219555	0.104246	1.29814e-06	6.94293e-07	0.121489	0.0557546	0.104246	0.0100759	1.25472e-07	3.29654e-06	0.576839	0.00538899	1	0.126201	0.114322	1.42361e-06	3.99083e-06	0.698328	0.0611436
											pKa6	11.633			-0.42	-420	7.00881	1.83819e-05	258300	0.67744	0.142678	1.83819e-05	258300	0.0137906	7.00881	0.0113949	0.0798649	1.46807e-06	3.60339e-07	0.0930757	0.0630533	0.0798649	0.0113949	2.09461e-07	2.52555e-06	0.65235	0.00899628	1	0.0912599	0.0912599	1.67753e-06	2.88589e-06	0.745426	0.0720495
											Ka,1	0.00316228			-0.43	-430	10.346	2.71344e-05	381289	1	0.210613	2.71344e-05	381289	0.0203569	10.346	0.00570541	0.0590283	1.6017e-06	1.80421e-07	0.0687925	0.0687925	0.0590283	0.0124321	3.37337e-07	1.86664e-06	0.711728	0.0144886	1	0.0647337	0.0714604	1.93903e-06	2.04706e-06	0.780521	0.083281
											Ka,2	8.58064e-08			-0.44	-440	15.2722	4.00542e-05	562837	1.47614	0.310895	4.00542e-05	562837	0.0300497	15.2722	0.00277504	0.042381	1.69754e-06	8.77543e-08	0.0493914	0.0729088	0.042381	0.013176	5.27755e-07	1.3402e-06	0.754316	0.022667	1	0.045156	0.055557	2.22529e-06	1.42796e-06	0.803708	0.0955758
											Ka,3	2.3283e-12			-0.45	-450	22.544	5.91259e-05	830829	2.179	0.458926	5.91259e-05	830829	0.0443577	22.544	0.00131833	0.0297205	1.75725e-06	4.16894e-08	0.0346367	0.0754735	0.0297205	0.0136395	8.06447e-07	9.39845e-07	0.780851	0.0346367	1	0.0310389	0.04336	2.5637e-06	9.81535e-07	0.815487	0.11011
											Ka,4	0.00316228			-0.46	-460	33.2782	8.72783e-05	1.22642e+06	3.21652	0.67744	8.72783e-05	1.22642e+06	0.0654783	33.2782	0.00061396	0.0204315	1.78323e-06	1.94151e-08	0.0238112	0.0765892	0.0204315	0.0138411	1.20803e-06	6.46101e-07	0.792393	0.0518846	1	0.0210455	0.0342726	2.99126e-06	6.65516e-07	0.816204	0.128474
											Ka,5	1.74675e-09			-0.47	-470	49.1235	0.000128835	1.81038e+06	4.74805	1	0.000128835	1.81038e+06	0.0966555	49.1235	0.000280776	0.0137927	1.77699e-06	8.87892e-09	0.0160742	0.0763212	0.0137927	0.0137927	1.77699e-06	4.36163e-07	0.789621	0.0763212	1	0.0140735	0.0275854	3.55397e-06	4.45042e-07	0.805695	0.152642
											Ka,6	2.3283e-12			-0.48	-480	72.5133	0.00019018	2.67238e+06	7.00881	1.47614	0.00019018	2.67238e+06	0.142678	72.5133	0.000126068	0.00914164	1.73856e-06	3.98663e-09	0.0106538	0.0746705	0.00914164	0.0134944	2.56636e-06	2.89084e-07	0.772543	0.110224	1	0.00926771	0.022636	4.30491e-06	2.93071e-07	0.783197	0.184895
											pH	7			-0.49	-490	107.04	0.000280733	3.94482e+06	10.346	2.179	0.000280733	3.94482e+06	0.210613	107.04	5.54664e-05	0.00593714	1.66675e-06	1.754e-09	0.00691922	0.0715864	0.00593714	0.012937	3.63185e-06	1.87749e-07	0.740635	0.155987	1	0.0059926	0.0188742	5.2986e-06	1.89503e-07	0.747554	0.227574
											[H+] (M)	1e-07			-0.5	-500	158.007	0.000414402	5.82312e+06	15.2722	3.21652	0.000414402	5.82312e+06	0.310895	158.007	2.38302e-05	0.00376533	1.56036e-06	7.53576e-10	0.00438817	0.0670171	0.00376533	0.0121113	5.01893e-06	1.1907e-07	0.69336	0.215562	1	0.00378916	0.0158766	6.5793e-06	1.19824e-07	0.697748	0.282579
															-0.51	-510	233.241	0.000611717	8.59577e+06	22.544	4.74805	0.000611717	8.59577e+06	0.458926	233.241	9.95307e-06	0.00232146	1.42008e-06	3.14744e-10	0.00270547	0.0609921	0.00232146	0.0110224	6.74261e-06	7.34111e-08	0.631025	0.289594	1	0.00233142	0.0133439	8.16269e-06	7.37259e-08	0.633731	0.350586
															-0.52	-520	344.297	0.000902983	1.26886e+07	33.2782	7.00881	0.000902983	1.26886e+07	0.67744	344.297	4.02259e-06	0.00138497	1.2506e-06	1.27206e-10	0.00161406	0.0537131	0.00138497	0.00970698	8.76524e-06	4.37965e-08	0.555717	0.376465	1	0.00138899	0.0110919	1.00158e-05	4.39237e-08	0.557331	0.430178
															-0.53	-530	508.232	0.00133293	1.87302e+07	49.1235	10.346	0.00133293	1.87302e+07	1	508.232	1.56734e-06	0.000796571	1.06178e-06	4.95635e-11	0.000928335	0.0456031	0.000796571	0.00824134	1.09852e-05	2.51898e-08	0.47181	0.47181	1	0.000798139	0.00903791	1.20469e-05	2.52394e-08	0.472739	0.517413
															-0.54	-540	750.225	0.0019676	2.76485e+07	72.5133	15.2722	0.0019676	2.76485e+07	1.47614	750.225	5.87732e-07	0.000440931	8.67578e-07	1.85857e-11	0.000513867	0.0372622	0.000440931	0.006734	1.32498e-05	1.39435e-08	0.385516	0.569077	1	0.000441519	0.00717493	1.41174e-05	1.39621e-08	0.38603	0.60634
															-0.55	-550	1107.44	0.00290447	4.08132e+07	107.04	22.544	0.00290447	4.08132e+07	2.179	1107.44	2.12295e-07	0.000235104	6.82853e-07	6.71337e-12	0.000273994	0.0293284	0.000235104	0.0053002	1.53942e-05	7.43465e-09	0.303432	0.661179	1	0.000235317	0.0055353	1.60771e-05	7.44137e-09	0.303706	0.690507
															-0.56	-560	1634.74	0.00428741	6.02462e+07	158.007	33.2782	0.00428741	6.02462e+07	3.21652	1634.74	7.4113e-08	0.000121156	5.19444e-07	2.34366e-12	0.000141196	0.02231	0.000121156	0.00403184	1.72862e-05	3.83128e-09	0.23082	0.742437	1	0.00012123	0.004153	1.78056e-05	3.83362e-09	0.230961	0.764747
															-0.57	-570	2413.12	0.00632884	8.89321e+07	233.241	49.1235	0.00632884	8.89321e+07	4.74805	2413.12	2.51312e-08	6.06444e-05	3.83809e-07	7.94718e-13	7.06759e-05	0.0164845	6.06444e-05	0.00297907	1.8854e-05	1.91775e-09	0.170549	0.809776	1	6.06696e-05	0.00303971	1.92378e-05	1.91854e-09	0.17062	0.826261
															-0.58	-580	3562.11	0.00934229	1.31277e+08	344.297	72.5133	0.00934229	1.31277e+08	7.00881	3562.11	8.32421e-09	2.96517e-05	2.77015e-07	2.63235e-13	3.45566e-05	0.0118977	2.96517e-05	0.00215015	2.00873e-05	9.3767e-10	0.123094	0.862744	1	2.96601e-05	0.0021798	2.03643e-05	9.37933e-10	0.123129	0.874641
															-0.59	-590	5258.18	0.0137906	1.93783e+08	508.232	107.04	0.0137906	1.93783e+08	10.346	5258.18	2.70788e-09	1.42385e-05	1.96357e-07	8.56306e-14	1.65938e-05	0.0084335	1.42385e-05	0.00152409	2.10181e-05	4.50262e-10	0.0872531	0.902723	1	1.42412e-05	0.00153833	2.12145e-05	4.50347e-10	0.0872697	0.911156
															-0.6	-600	7761.84	0.0203569	2.86052e+08	750.225	158.007	0.0203569	2.86052e+08	15.2722	7761.84	8.69139e-10	6.74612e-06	1.3733e-07	2.74846e-14	7.86202e-06	0.00589828	6.74612e-06	0.00106593	2.1699e-05	2.13331e-10	0.0610238	0.931969	1	6.74699e-06	0.00107268	2.18364e-05	2.13358e-10	0.0610316	0.937867
